# Supplementary material for: Nano-TiO2 and elevated temperature impair intestinal health in crabs via a mussel-based food chain
Source: Royal Society of Chemistry journal article supplement (doi:10.1039/d4en00657g), 2024-01-01
Supplement: d4en00657g1.pdf [file d4en00657g1.pdf]

## Supplementary Materials for:

# Nano-TiO<sub>2</sub> and elevated temperature impair intestinal health in crabs via a mussel-based food chain

Rim EL Amouri<sup>a, b1</sup>, Zhihan Tu<sup>a, b1</sup>, Mohamed H. Abo-Raya<sup>a, b,d</sup>, Xiaotong Wang<sup>c</sup>, Yuntian Shi<sup>a,b</sup>,  
Menghong Hu<sup>a,b</sup>, Youji Wang<sup>a,b\*</sup>

<sup>a</sup> International Research Center for Marine Biosciences, Ministry of Science and Technology,  
Shanghai Ocean University, Shanghai 201306, China

<sup>b</sup> Key Laboratory of Exploration and Utilization of Aquatic Genetic Resources, Ministry of  
Education, Shanghai Ocean University, Shanghai 201306, China

<sup>c</sup> Department of Aquaculture, Faculty of Aquatic and Fisheries Sciences, Kafrelsheikh University,  
Kafrelsheikh 33516, Egypt.

\* **Corresponding authors:** Youji Wang, Email: youjiwang2@gmail.com

<sup>1</sup> These authors contributed equally to this work.

**Table S1** The interactive effects of nano-TiO<sub>2</sub>, warming, exposures, and their combination on *C. japonica* digestive enzymes and ATP variation.

| 3W-ANOVA results<br>Parameters                                                                                       | Lipase |         | Amylase |         | Trypsin |         | ATP   |         |
|----------------------------------------------------------------------------------------------------------------------|--------|---------|---------|---------|---------|---------|-------|---------|
|                                                                                                                      | % OTV  | P-value | % OTV   | P-value | % OTV   | P-value | % OTV | P-value |
| <b>Source of Variation</b>                                                                                           |        |         |         |         |         |         |       |         |
| Direct vs. indirect vs. combined exposures                                                                           | 49.30  | <0.0001 | 14.37   | <0.0001 | 16.83   | <0.0001 | 17.36 | <0.0001 |
| Normal vs. high temperature                                                                                          | 0.0005 | 0.92    | 1.73    | 0.009   | 15.44   | <0.0001 | 3.50  | 0.006   |
| zero vs high nano-TiO <sub>2</sub>                                                                                   | 12.37  | <0.0001 | 13.73   | <0.0001 | 0.01    | 0.82    | 7.27  | 0.0001  |
| Direct vs. indirect vs combined exposures x<br>Normal vs. high temperature                                           | 2.46   | <0.0001 | 29.60   | <0.0001 | 7.94    | <0.0001 | 4.82  | 0.005   |
| Direct vs. indirect vs. combined exposures x<br>zero vs. high nano-TiO <sub>2</sub>                                  | 18.34  | <0.0001 | 1.25    | 0.08    | 7.46    | 0.0001  | 17.52 | <0.0001 |
| Normal vs. high temperature x zero vs. high<br>nano-TiO <sub>2</sub>                                                 | 2.90   | <0.0001 | 20.56   | <0.0001 | 14.20   | <0.0001 | 8.27  | <0.0001 |
| Direct vs. indirect vs. combined exposures x<br>Normal vs. high temperature x zero vs. high<br>nano-TiO <sub>2</sub> | 11.75  | <0.0001 | 7.39    | <0.0001 | 16.33   | <0.0001 | 15.39 | <0.0001 |

% OTV: percentage of total variation contribution.

**Table S2** The interactive effects of nano-TiO<sub>2</sub>, warming, exposures, and their combination on *C. japonica* proximate chemical composition variation.

| Parameters<br>3W-ANOVA results                                                                                 | Protein |                 | Lipid |                 | Carbohydrate |                 | Ash   |                 | Moisture |                 |
|----------------------------------------------------------------------------------------------------------------|---------|-----------------|-------|-----------------|--------------|-----------------|-------|-----------------|----------|-----------------|
|                                                                                                                | % OTV   | <i>P</i> -value | % OTV | <i>P</i> -value | % OTV        | <i>P</i> -value | % OTV | <i>P</i> -value | % OTV    | <i>P</i> -value |
| Source of Variation                                                                                            |         |                 |       |                 |              |                 |       |                 |          |                 |
| Direct vs. indirect vs. combined exposures                                                                     | 9.37    | <0.0001         | 19.33 | <0.0001         | 7.36         | <0.0001         | 11.75 | 0.008           | 3.06     | 0.002           |
| Normal vs. high temperature                                                                                    | 52.65   | <0.0001         | 10.93 | <0.0001         | 63.77        | <0.0001         | 0.005 | 0.94            | 51.13    | <0.0001         |
| zero vs high nano-TiO <sub>2</sub>                                                                             | 10.25   | <0.0001         | 3.91  | 0.004           | 6.28         | <0.0001         | 6.34  | 0.02            | 7.05     | <0.0001         |
| Direct vs. indirect vs combined exposures x Normal vs. high temperature                                        | 1.73    | 0.01            | 5.17  | 0.005           | 0.57         | 0.08            | 6.03  | 0.07            | 0.38     | 0.44            |
| Direct vs. indirect vs. combined exposures x zero vs. high nano-TiO <sub>2</sub>                               | 1.49    | 0.01            | 28.19 | <0.0001         | 2.54         | <0.0001         | 0.15  | 0.93            | 9.40     | <0.0001         |
| Normal vs. high temperature x zero vs. high nano-TiO <sub>2</sub>                                              | 13.18   | <0.0001         | 0.13  | 0.58            | 12.00        | <0.0001         | 7.30  | 0.01            | 12.29    | <0.0001         |
| Direct vs. indirect vs. combined exposures x Normal vs. high temperature x zero vs. high nano-TiO <sub>2</sub> | 0.66    | 0.16            | 4.83  | 0.007           | 0.62         | 0.07            | 0.37  | 0.84            | 2.68     | 0.005           |

% OTV: percentage of total variation contribution.

**Table S3** The interactive effects of AnTiO<sub>2</sub>, warming, exposures, and their combination on *C. japonica* alpha diversity estimators' variation.

| Parameters                                                                                                     | Chao1 |                 | Simpson |                 | Shannon |                 |
|----------------------------------------------------------------------------------------------------------------|-------|-----------------|---------|-----------------|---------|-----------------|
|                                                                                                                | % OTV | <i>P</i> -value | % OTV   | <i>P</i> -value | % OTV   | <i>P</i> -value |
| <b>3W-ANOVA results</b>                                                                                        |       |                 |         |                 |         |                 |
| <b>Source of Variation</b>                                                                                     |       |                 |         |                 |         |                 |
| Direct vs. indirect vs. combined exposures                                                                     | 1.65  | 0.18            | 33.43   | <0.0001         | 24.81   | <0.0001         |
| Normal vs. high temperature                                                                                    | 8.86  | 0.0001          | 0.56    | 0.23            | 4.27    | 0.03            |
| zero vs. high nano-TiO <sub>2</sub>                                                                            | 5.59  | 0.001           | 17.49   | <0.0001         | 5.67    | 0.01            |
| Direct vs. indirect vs. combined exposures x Normal vs. high temperature                                       | 31.72 | <0.0001         | 23.60   | <0.0001         | 20.72   | 0.0002          |
| Direct vs. indirect vs. combined exposures x zero vs. high nano-TiO <sub>2</sub>                               | 7.27  | 0.001           | 8.48    | 0.0002          | 3.59    | 0.15            |
| Normal vs. high temperature x zero vs. high nano-TiO <sub>2</sub>                                              | 9.71  | <0.0001         | 0.20    | 0.46            | 6.19    | 0.01            |
| Direct vs. indirect vs. combined exposures x Normal vs. high temperature x zero vs. high nano-TiO <sub>2</sub> | 18.29 | <0.0001         | 2.33    | 0.06            | 1.18    | 0.53            |

% OTV: percentage of total variation contribution.
